# Supplementary material
Source: PubMed Central journal article supplement (PMC1867571)
Supplement: jmd_8_1_89__1.pdf [file jmd_8_1_89__1.pdf]

|                        |                   | pXO1                        |                       |                     |                       |                     | pXO2                        |                       |                     |                       |                     |
|------------------------|-------------------|-----------------------------|-----------------------|---------------------|-----------------------|---------------------|-----------------------------|-----------------------|---------------------|-----------------------|---------------------|
| <b>Anthraxis Panel</b> |                   |                             | cya/capB/IPC          |                     | pagA/capB/IPC         |                     |                             | cya/capB/IPC          |                     | pagA/capB/IPC         |                     |
| <b>Organism</b>        | <b>Strain</b>     | <b>Previous<sup>a</sup></b> | <b>Initial Design</b> | <b>Final Design</b> | <b>Initial Design</b> | <b>Final Design</b> | <b>Previous<sup>a</sup></b> | <b>Initial Design</b> | <b>Final Design</b> | <b>Initial Design</b> | <b>Final Design</b> |
| Bacillus anthracis     | 57                | +                           | +                     | +                   | N.D.                  | +                   | +                           | +                     | +                   | N.D.                  | +                   |
| Bacillus anthracis     | 108               | +                           | +                     | +                   | N.D.                  | +                   | +                           | +                     | +                   | N.D.                  | +                   |
| Bacillus anthracis     | 183               | -                           | -                     | -                   | N.D.                  | -                   | -                           | -                     | -                   | N.D.                  | -                   |
| Bacillus anthracis     | 205               | +                           | +                     | +                   | N.D.                  | +                   | +                           | +                     | +                   | N.D.                  | +                   |
| Bacillus anthracis     | 4229              | -                           | -                     | -                   | N.D.                  | -                   | +                           | +                     | +                   | N.D.                  | +                   |
| Bacillus anthracis     | 4728              | -                           | -                     | -                   | N.D.                  | -                   | +                           | +                     | +                   | N.D.                  | +                   |
| Bacillus anthracis     | Ames              | +                           | +                     | +                   | N.D.                  | +                   | +                           | +                     | +                   | N.D.                  | +                   |
| Bacillus anthracis     | BGC 8246/FTD 1064 | +                           | +                     | +                   | N.D.                  | +                   | -                           | -                     | -                   | N.D.                  | -                   |
| Bacillus anthracis     | Buffalo           | +                           | +                     | +                   | N.D.                  | +                   | +                           | +                     | +                   | N.D.                  | +                   |
| Bacillus anthracis     | CDC 471           | -                           | NSA                   | -                   | N.D.                  | -                   | -                           | NSA                   | -                   | N.D.                  | -                   |
| Bacillus anthracis     | CDC 607           | +                           | +                     | +                   | N.D.                  | +                   | +                           | +                     | +                   | N.D.                  | +                   |
| Bacillus anthracis     | Delta NH-1        | -                           | -                     | -                   | N.D.                  | -                   | +                           | +                     | +                   | N.D.                  | +                   |
| Bacillus anthracis     | Delta Sterne      | -                           | -                     | -                   | N.D.                  | -                   | -                           | NSA                   | -                   | N.D.                  | -                   |
| Bacillus anthracis     | English Vollum    | +                           | +                     | +                   | N.D.                  | +                   | +                           | +                     | +                   | N.D.                  | +                   |
| Bacillus anthracis     | FLA-V770          | +                           | +                     | +                   | N.D.                  | +                   | +                           | +                     | +                   | N.D.                  | +                   |
| Bacillus anthracis     | G-28              | +                           | +                     | +                   | N.D.                  | +                   | +                           | +                     | +                   | N.D.                  | +                   |
| Bacillus anthracis     | Ger. LVS          | +                           | +                     | +                   | N.D.                  | +                   | -                           | -                     | -                   | N.D.                  | -                   |
| Bacillus anthracis     | M                 | +                           | +                     | +                   | N.D.                  | +                   | -                           | NSA                   | -                   | N.D.                  | -                   |
| Bacillus anthracis     | N-99              | +                           | +                     | +                   | N.D.                  | +                   | +                           | +                     | +                   | N.D.                  | +                   |
| Bacillus anthracis     | N994              | +                           | +                     | +                   | N.D.                  | +                   | +                           | +                     | +                   | N.D.                  | +                   |
| Bacillus anthracis     | New Hampshire     | +                           | +                     | +                   | N.D.                  | +                   | +                           | +                     | +                   | N.D.                  | +                   |
| Bacillus anthracis     | New Hampshire     | +                           | +                     | +                   | N.D.                  | +                   | +                           | +                     | +                   | N.D.                  | +                   |
| Bacillus anthracis     | SK-102            | +                           | +                     | +                   | N.D.                  | +                   | -                           | -                     | -                   | N.D.                  | -                   |
| Bacillus anthracis     | SK-128            | +                           | +                     | +                   | N.D.                  | +                   | +                           | +                     | +                   | N.D.                  | +                   |
| Bacillus anthracis     | SK-162            | +                           | +                     | +                   | N.D.                  | +                   | +                           | +                     | +                   | N.D.                  | +                   |

|                       |                  |                             |                           |                         |                           |                         |                             |                           |                         |                           |                         |  |
|-----------------------|------------------|-----------------------------|---------------------------|-------------------------|---------------------------|-------------------------|-----------------------------|---------------------------|-------------------------|---------------------------|-------------------------|--|
| Bacillus anthracis    | SK-31            | +                           | +                         | +                       | N.D.                      | +                       | +                           | +                         | +                       | N.D.                      | +                       |  |
| Bacillus anthracis    | SK-465           | +                           | +                         | +                       | N.D.                      | +                       | -                           | NSA                       | -                       | N.D.                      | -                       |  |
| Bacillus anthracis    | SPS<br>97.13.079 | +                           | +                         | +                       | N.D.                      | +                       | +                           | +                         | +                       | N.D.                      | +                       |  |
| Bacillus anthracis    | SPS<br>97.13.213 | +                           | +                         | +                       | N.D.                      | +                       | -                           | -                         | -                       | N.D.                      | -                       |  |
| Bacillus anthracis    | ST-1             | +                           | +                         | +                       | N.D.                      | +                       | -                           | -                         | -                       | N.D.                      | -                       |  |
| Bacillus anthracis    | ST-15            | +                           | +                         | +                       | N.D.                      | +                       | -                           | NSA                       | -                       | N.D.                      | -                       |  |
| Bacillus anthracis    | Sterne           | +                           | +                         | +                       | N.D.                      | +                       | -                           | -                         | -                       | N.D.                      | -                       |  |
| Bacillus anthracis    | V770             | +                           | +                         | +                       | N.D.                      | +                       | +                           | +                         | +                       | N.D.                      | +                       |  |
| Bacillus anthracis    | V770-2P          | +                           | +                         | +                       | N.D.                      | +                       | +                           | +                         | +                       | N.D.                      | +                       |  |
| Bacillus anthracis    | V770-NP-<br>1R   | +                           | +                         | +                       | N.D.                      | +                       | -                           | -                         | -                       | N.D.                      | -                       |  |
| Bacillus anthracis    | Vollum           | +                           | +                         | +                       | N.D.                      | +                       | +                           | +                         | +                       | N.D.                      | +                       |  |
| Bacillus anthracis    | Vollum 1B        | +                           | +                         | +                       | N.D.                      | +                       | +                           | +                         | +                       | N.D.                      | +                       |  |
| Bacillus anthracis    | Vollum-1         | +                           | +                         | +                       | N.D.                      | +                       | +                           | +                         | +                       | N.D.                      | +                       |  |
|                       |                  |                             |                           |                         |                           |                         |                             |                           |                         |                           |                         |  |
|                       |                  | pXO1                        |                           |                         |                           |                         | pXO2                        |                           |                         |                           |                         |  |
| <b>Bacillus Panel</b> |                  |                             | <b>cya/capB/<br/>IPC</b>  |                         | <b>pagA/capB/IPC</b>      |                         |                             | <b>cya/capB/<br/>IPC</b>  |                         | <b>pagA/capB/IPC</b>      |                         |  |
| <b>Organism</b>       | <b>Strain</b>    | <b>Previous<sup>a</sup></b> | <b>Initial<br/>Design</b> | <b>Final<br/>Design</b> | <b>Initial<br/>Design</b> | <b>Final<br/>Design</b> | <b>Previous<sup>a</sup></b> | <b>Initial<br/>Design</b> | <b>Final<br/>Design</b> | <b>Initial<br/>Design</b> | <b>Final<br/>Design</b> |  |
| Bacillus cereus       | 10876            | -                           | -                         | -                       | N.D.                      | -                       | -                           | -                         | -                       | N.D.                      | -                       |  |
| Bacillus cereus       | 13061            | -                           | -                         | -                       | N.D.                      | -                       | -                           | NSA                       | -                       | N.D.                      | -                       |  |
| Bacillus cereus       | 7039             | -                           | -                         | -                       | N.D.                      | -                       | -                           | -                         | -                       | N.D.                      | -                       |  |
| Bacillus cereus       | 13472            | -                           | -                         | -                       | N.D.                      | -                       | -                           | -                         | -                       | N.D.                      | -                       |  |
| Bacillus cereus       | 13824            | -                           | -                         | -                       | N.D.                      | -                       | -                           | NSA                       | -                       | N.D.                      | -                       |  |
| Bacillus cereus       | 14603            | -                           | -                         | -                       | N.D.                      | -                       | -                           | NSA                       | -                       | N.D.                      | -                       |  |
| Bacillus cereus       | 14893            | -                           | -                         | -                       | N.D.                      | -                       | -                           | -                         | -                       | N.D.                      | -                       |  |
| Bacillus cereus       | 15816            | -                           | NSA                       | -                       | N.D.                      | -                       | -                           | -                         | -                       | N.D.                      | -                       |  |
| Bacillus cereus       | 19625            | -                           | -                         | -                       | N.D.                      | -                       | -                           | -                         | -                       | N.D.                      | -                       |  |
| Bacillus cereus       | 19637            | -                           | -                         | -                       | N.D.                      | -                       | -                           | -                         | -                       | N.D.                      | -                       |  |
| Bacillus cereus       | 21182            | -                           | -                         | -                       | N.D.                      | -                       | -                           | -                         | -                       | N.D.                      | -                       |  |
| Bacillus cereus       | 21366            | -                           | -                         | -                       | N.D.                      | -                       | -                           | NSA                       | -                       | N.D.                      | -                       |  |

|                        |            |   |     |   |      |   |   |     |   |      |   |
|------------------------|------------|---|-----|---|------|---|---|-----|---|------|---|
| Bacillus cereus        | 21634      | - | -   | - | N.D. | - | - | -   | - | N.D. | - |
| Bacillus cereus        | 21769      | - | -   | - | N.D. | - | - | -   | - | N.D. | - |
| Bacillus cereus        | 21768      | - | -   | - | N.D. | - | - | -   | - | N.D. | - |
| Bacillus cereus        | 21771      | - | -   | - | N.D. | - | - | -   | - | N.D. | - |
| Bacillus cereus        | 21772      | - | -   | - | N.D. | - | - | -   | - | N.D. | - |
| Bacillus cereus        | 21770      | - | -   | - | N.D. | - | - | NSA | - | N.D. | - |
| Bacillus cereus        | 21928      | - | -   | - | N.D. | - | - | -   | - | N.D. | - |
| Bacillus cereus        | 25621      | - | -   | - | N.D. | - | - | -   | - | N.D. | - |
| Bacillus cereus        | 27348      | - | -   | - | N.D. | - | - | -   | - | N.D. | - |
| Bacillus cereus        | 27522      | - | -   | - | N.D. | - | - | NSA | - | N.D. | - |
| Bacillus cereus        | 27877      | - | -   | - | N.D. | - | - | -   | - | N.D. | - |
| Bacillus cereus        | 31293      | - | -   | - | N.D. | - | - | -   | - | N.D. | - |
| Bacillus cereus        | 31429      | - | -   | - | N.D. | - | - | NSA | - | N.D. | - |
| Bacillus cereus        | 31430      | - | -   | - | N.D. | - | - | -   | - | N.D. | - |
| Bacillus cereus        | 33018      | - | -   | - | N.D. | - | - | -   | - | N.D. | - |
| Bacillus cereus        | 33019      | - | -   | - | N.D. | - | - | NSA | - | N.D. | - |
| Bacillus cereus        | 43881      | - | -   | - | N.D. | - | - | -   | - | N.D. | - |
| Bacillus cereus        | 53522      | - | -   | - | N.D. | - | - | -   | - | N.D. | - |
| Bacillus cereus        | 55055      | - | -   | - | N.D. | - | - | -   | - | N.D. | - |
| Bacillus cereus        | 700282     | - | NSA | - | N.D. | - | - | NSA | - | N.D. | - |
| Bacillus cereus        | 9139       | - | -   | - | N.D. | - | - | -   | - | N.D. | - |
| Bacillus coagulans     | 7050       | - | -   | - | N.D. | - | - | -   | - | N.D. | - |
| Bacillus macerans      | 8244       | - | -   | - | N.D. | - | - | -   | - | N.D. | - |
| Bacillus popilliae     | 14706      | - | -   | - | N.D. | - | - | -   | - | N.D. | - |
| Bacillus subtilis      | var. Niger | - | -   | - | N.D. | - | - | -   | - | N.D. | - |
| Bacillus thuringiensis | 35646      | - | -   | - | N.D. | - | - | -   | - | N.D. | - |
| Bacillus thuringiensis | 39152      | - | -   | - | N.D. | - | - | -   | - | N.D. | - |
| Bacillus thuringiensis |            | - | -   | - | N.D. | - | - | -   | - | N.D. | - |
| Bacillus thuringiensis | 10792      | - | -   | - | N.D. | - | - | -   | - | N.D. | - |
| Bacillus thuringiensis | 13366      | - | -   | - | N.D. | - | - | -   | - | N.D. | - |

|                           |               |                             |                       |                     |                       |                     |                             |                       |                     |                       |                     |
|---------------------------|---------------|-----------------------------|-----------------------|---------------------|-----------------------|---------------------|-----------------------------|-----------------------|---------------------|-----------------------|---------------------|
| Bacillus thuringiensis    | 13367         | -                           | -                     | -                   | N.D.                  | -                   | -                           | -                     | -                   | N.D.                  | -                   |
| Bacillus thuringiensis    | 19266         | -                           | -                     | -                   | N.D.                  | -                   | -                           | -                     | -                   | N.D.                  | -                   |
| Bacillus thuringiensis    | 19267         | -                           | -                     | -                   | N.D.                  | -                   | -                           | -                     | -                   | N.D.                  | -                   |
| Bacillus thuringiensis    | 19268         | -                           | -                     | -                   | N.D.                  | -                   | -                           | NSA                   | -                   | N.D.                  | -                   |
| Bacillus thuringiensis    | 19269         | -                           | -                     | -                   | N.D.                  | -                   | -                           | NSA                   | -                   | N.D.                  | -                   |
| Bacillus thuringiensis    | 19270         | -                           | -                     | -                   | N.D.                  | -                   | -                           | -                     | -                   | N.D.                  | -                   |
| Bacillus thuringiensis    | 29730         | -                           | -                     | -                   | N.D.                  | -                   | -                           | -                     | -                   | N.D.                  | -                   |
| Bacillus thuringiensis    | 33679         | -                           | -                     | -                   | N.D.                  | -                   | -                           | -                     | -                   | N.D.                  | -                   |
|                           |               |                             |                       |                     |                       |                     |                             |                       |                     |                       |                     |
|                           |               | pXO1                        |                       |                     |                       | pXO2                |                             |                       |                     |                       |                     |
| <b>General Panel</b>      |               |                             | cya/capB/IPC          |                     | pagA/capB/IPC         |                     |                             | cya/capB/IPC          |                     | pagA/capB/IPC         |                     |
| <b>Organism</b>           | <b>Strain</b> | <b>Previous<sup>a</sup></b> | <b>Initial Design</b> | <b>Final Design</b> | <b>Initial Design</b> | <b>Final Design</b> | <b>Previous<sup>a</sup></b> | <b>Initial Design</b> | <b>Final Design</b> | <b>Initial Design</b> | <b>Final Design</b> |
| Acinetobacter baumannii   | 19606         | -                           | N.D.                  | -                   | N.D.                  | -                   | -                           | N.D.                  | -                   | N.D.                  | -                   |
| Alcaligenes xylosoxydans  | 27061         | -                           | N.D.                  | -                   | N.D.                  | -                   | -                           | N.D.                  | -                   | N.D.                  | -                   |
| Bacteroides distasonis    | 8503          | -                           | N.D.                  | -                   | N.D.                  | -                   | -                           | N.D.                  | -                   | N.D.                  | -                   |
| Bordetella bronchiseptica | 10580         | -                           | N.D.                  | -                   | N.D.                  | -                   | -                           | N.D.                  | -                   | N.D.                  | -                   |
| Brucella abortus          |               | -                           | N.D.                  | -                   | N.D.                  | -                   | -                           | N.D.                  | -                   | N.D.                  | -                   |
| Brucella melitensis       |               | -                           | N.D.                  | - <sup>b</sup>      | N.D.                  | -                   | -                           | N.D.                  | -                   | N.D.                  | -                   |
| Brucella canis            |               | -                           | N.D.                  | -                   | N.D.                  | -                   | -                           | N.D.                  | -                   | N.D.                  | -                   |
| Brucella maris            |               | -                           | N.D.                  | -                   | N.D.                  | -                   | -                           | N.D.                  | -                   | N.D.                  | -                   |
| Brucella suis             |               | -                           | N.D.                  | -                   | N.D.                  | -                   | -                           | N.D.                  | -                   | N.D.                  | -                   |
| Brucella neotomae         |               | -                           | N.D.                  | -                   | N.D.                  | -                   | -                           | N.D.                  | -                   | N.D.                  | -                   |
| Brucella ovis             |               | -                           | N.D.                  | -                   | N.D.                  | -                   | -                           | N.D.                  | -                   | N.D.                  | -                   |
| Budvicia aquatica         | 35567         | -                           | N.D.                  | -                   | N.D.                  | -                   | -                           | N.D.                  | -                   | N.D.                  | -                   |
| Burkholderia              | 25416         | -                           | N.D.                  | -                   | N.D.                  | -                   | -                           | N.D.                  | -                   | N.D.                  | -                   |



|                                                              |         |   |      |   |      |                |   |      |   |      |   |
|--------------------------------------------------------------|---------|---|------|---|------|----------------|---|------|---|------|---|
| Francisella tularensis                                       | NA      | - | N.D. | - | N.D. | -              | - | N.D. | - | N.D. | - |
| Haemophilus influenzae                                       | 10211   | - | N.D. | - | N.D. | -              | - | N.D. | - | N.D. | - |
| Haemophilus influenzae                                       | 51907D  | - | N.D. | - | N.D. | -              | - | N.D. | - | N.D. | - |
| Klebsiella pneumoniae                                        | 13883   | - | N.D. | - | N.D. | -              | - | N.D. | - | N.D. | - |
| Klebsiella oxytoca                                           | 49131   | - | N.D. | - | N.D. | -              | - | N.D. | - | N.D. | - |
| Klebsiella pneumoniae subsp. pneumoniae                      | 700721D | - | N.D. | - | N.D. | -              | - | N.D. | - | N.D. | - |
| Listeria monocytogenes                                       | 15313   | - | N.D. | - | N.D. | -              | - | N.D. | - | N.D. | - |
| Moraxella catarrhalis                                        | 25240   | - | N.D. | - | N.D. | -              | - | N.D. | - | N.D. | - |
| Neisseria lactamica                                          | 23970   | - | N.D. | - | N.D. | -              | - | N.D. | - | N.D. | - |
| Pseudomonas aeruginosa                                       | 17933D  | - | N.D. | - | N.D. | -              | - | N.D. | - | N.D. | - |
| Proteus mirabilis                                            | 7002    | - | N.D. | - | N.D. | -              | - | N.D. | - | N.D. | - |
| Proteus vulgaris                                             | 49132   | - | N.D. | - | N.D. | -              | - | N.D. | - | N.D. | - |
| Providencia stuartii                                         | 33672   | - | N.D. | - | N.D. | -              | - | N.D. | - | N.D. | - |
| Ralstonia pickettii                                          | 27511   | - | N.D. | - | N.D. | -              | - | N.D. | - | N.D. | - |
| Staphylococcus aureus                                        | 35556D  | - | N.D. | - | N.D. | -              | - | N.D. | - | N.D. | - |
| Salmonella choleraesuis ssp. choleraesuis serotype Paratyphi | 9150D   | - | N.D. | - | N.D. | - <sup>b</sup> | - | N.D. | - | N.D. | - |
| Streptococcus pyogenes                                       | 12344D  | - | N.D. | - | N.D. | -              | - | N.D. | - | N.D. | - |
| Serratia marcescens                                          | 13880   | - | N.D. | - | N.D. | -              | - | N.D. | - | N.D. | - |
| Shigella flexneri                                            | 12022   | - | N.D. | - | N.D. | -              | - | N.D. | - | N.D. | - |
| Shigella sonnei                                              | 9290    | - | N.D. | - | N.D. | -              | - | N.D. | - | N.D. | - |
| Staphylococcus aureus                                        | 25923   | - | N.D. | - | N.D. | -              | - | N.D. | - | N.D. | - |
| Staphylococcus aureus                                        | 29213   | - | N.D. | - | N.D. | -              | - | N.D. | - | N.D. | - |

|                                 |       |   |      |   |      |   |   |      |   |      |   |
|---------------------------------|-------|---|------|---|------|---|---|------|---|------|---|
| Staphylococcus hominis          | 27844 | - | N.D. | - | N.D. | - | - | N.D. | - | N.D. | - |
| Staphylococcus aureus           | 29247 | - | N.D. | - | N.D. | - | - | N.D. | - | N.D. | - |
| Stenotrophomonas maltophilia    | 13637 | - | N.D. | - | N.D. | - | - | N.D. | - | N.D. | - |
| Streptococcus pyogenes          | 19615 | - | N.D. | - | N.D. | - | - | N.D. | - | N.D. | - |
| Streptococcus pneumoniae        | 33400 | - | N.D. | - | N.D. | - | - | N.D. | - | N.D. | - |
| Yersinia kristensenii           | 33639 | - | N.D. | - | N.D. | - | - | N.D. | - | N.D. | - |
| Yersinia frederiksenii          | 33641 | - | N.D. | - | N.D. | - | - | N.D. | - | N.D. | - |
| Yersinia kristensenii           | 33638 | - | N.D. | - | N.D. | - | - | N.D. | - | N.D. | - |
| Yersinia pseudotuberculosis     | 6904  | - | N.D. | - | N.D. | - | - | N.D. | - | N.D. | - |
| Yersinia ruckeri                | 29908 | - | N.D. | - | N.D. | - | - | N.D. | - | N.D. | - |
| Yersinia pestis (Antigua; Pgm+) |       | - | N.D. | - | N.D. | - | - | N.D. | - | N.D. | - |
| Yersinia pestis (Nairobi)       |       | - | N.D. | - | N.D. | - | - | N.D. | - | N.D. | - |
| Yersinia pestis (PBM19:Pgm+)    |       | - | N.D. | - | N.D. | - | - | N.D. | - | N.D. | - |
| Yersinia pestis (Pestoides B)   |       | - | N.D. | - | N.D. | - | - | N.D. | - | N.D. | - |
| Yersinia pestis (Pestoides F)   |       | - | N.D. | - | N.D. | - | - | N.D. | - | N.D. | - |
| Yersinia pestis Java 9          |       | - | N.D. | - | N.D. | - | - | N.D. | - | N.D. | - |
| Yersinia pestis (CO92;PW)       |       | - | N.D. | - | N.D. | - | - | N.D. | - | N.D. | - |

## Supplemental Table.

### Panel of Organisms Used to Test Analytical Specificity and Sensitivity with MultiCode-RTX *Bacillus anthracis*

#### Assay Results.

+ = Anthrax-related toxin genes detected

- = Anthrax-related toxin genes not detected

NSA = Non-Specific Amplification as defined by post-teaction melt  $T_m > 1^\circ\text{C}$  different from *Bacillus anthracis* Ames positive control.

N.D. = Not determined.

<sup>a</sup>Previously tested at USAMRIID by a combination of standard PCR, real-time PCR as well as by capsule and protective antigen protein expression

<sup>b</sup>Samples initially yielded NSA but were found to be negative by triplicate re-tresting
